# Supplementary material for: Steep Decline in Binding Capability of SARS-CoV-2 Omicron Variant (B.1.1.529) RBD to the Antibodies in Early COVID-19 Convalescent Sera and Inactivated Vaccine Sera
Source: MDPI journal article supplement (doi:10.3390/v14020335), 2022-02-07
Supplement: s1 [file s1]

## Supplementary materials

# Steep Decline in Binding Capability of SARS-CoV-2 Omicron Variant (B.1.1.529) RBD to the Antibodies in Early COVID-19 Convalescent Sera and Inactivated Vaccine Sera

Wenhao Zhou <sup>1,2,†</sup>, Ping He <sup>1,2,†</sup>, Junhua Li <sup>1,†</sup>, Huan Liu <sup>1,2</sup>, Mengjuan Shi <sup>1,2</sup>, Junping Yu <sup>1,2,\*</sup> and Hongping Wei <sup>1,2,\*</sup>

<sup>1</sup> CAS Key Laboratory of Special Pathogens and Biosafety, Center for Biosafety Mega-Science, Wuhan Institute of Virology, Chinese Academy of Sciences, Wuhan 430071, China; zyzwh1999@163.com (W.Z.); peace192@163.com (P.H.); Lijh@wh.iov.cn (J.L.); huanl88xiao@163.com (H.L.); shimengjuan20@mailsucas.ac.cn (M.S.)

<sup>2</sup> University of Chinese Academy of Sciences, Beijing 100049, China

\* Correspondence: yujp@wh.iov.cn (J.Y.); hpwei@wh.iov.cn (H.W.);  
Tel.: +86-27-5186-1078 (J.Y.); +86-27-5186-1077 (H.W.)

† These authors contribute equally to this work.

Table S1. The relationship between the neutralization titers of sera by PRNT50 and the corresponding RBD binding OD<sub>450 nm</sub> by ELISA using RBD of SARS-CoV-2 B.1 as the coating antigen. (Yellow items are with high PRNT50 and high QD<sub>450</sub> with dilution 1:20. Green ones are the samples with low PRNT50 and low QD<sub>450</sub>. Cyan ones are the samples with no relationship of PRNT50 and OD<sub>450 nm</sub>.)

| Sample | PRNT50/Dilution times | OD <sub>450 nm</sub> (dilution 1:20) | OD <sub>450 nm</sub> (dilution 1:80) |
|--------|-----------------------|--------------------------------------|--------------------------------------|
| Vac1   | >1280                 | 1.1876                               | 0.6373                               |
| Vac2   | 373                   | 1.072                                | 0.5494                               |
| Vac3   | 30                    | 0.6686                               | 0.2526                               |
| Vac4   | 86                    | 0.4512                               | 0.1836                               |
| Vac5   | 147                   | 0.8509                               | 0.4495                               |
| Vac6   | 98                    | 0.7648                               | 0.3176                               |
| Vac7   | 160                   | 0.671                                | 0.4001                               |
| Conv1  | 491                   | 0.9844                               | 0.5966                               |
| Conv2  | 101                   | 0.694                                | 0.344                                |
| Conv3  | <20                   | 0.0654                               | -                                    |
| Conv4  | >1280                 | 1.2844                               | 1.0373                               |
| Conv5  | 982                   | 0.6485                               | 0.3267                               |
| Conv6  | 478                   | 0.8965                               | 0.6374                               |
| Conv7  | 494                   | 0.7255                               | 0.3261                               |
| Conv8  | 54                    | 0.7566                               | 0.3093                               |
| Conv9  | 55                    | 0.421                                | 0.1712                               |
| Conv10 | 797                   | 0.3053                               | 0.2374                               |
| Conv11 | 63                    | 0.7554                               | 0.3606                               |
| Conv12 | >1280                 | 1.1431                               | 0.7322                               |
| Conv13 | 451                   | 0.7515                               | 0.6627                               |
| Conv14 | 149                   | 0.4786                               | 0.2072                               |
| Conv15 | 241                   | 0.5473                               | 0.3228                               |
| Conv16 | 160                   | 0.3469                               | 0.1175                               |
| Conv17 | 142                   | 0.5062                               | 0.2411                               |

Table S2. OD<sub>450 nm</sub> of ELISA and the Omicron/Delta reduction rate of the RBD binding capability to the 11 vaccinated serum samples from ELISA results at dilutions of 1:20 and 1:80.

| Sample name | 1:20    |        |        | 1:20 (take the blank off) |        |        | Omicron reduction rate%* | Delta reduction rate% | 1:80    |        |        | 1:80 (take the blank off) |        |        | Omicron reduction rate% | Delta reduction rate% |
|-------------|---------|--------|--------|---------------------------|--------|--------|--------------------------|-----------------------|---------|--------|--------|---------------------------|--------|--------|-------------------------|-----------------------|
|             | Omicron | Delta  | B.1    | Omicron                   | Delta  | B.1    |                          |                       | Omicron | Delta  | B.1    | Omicron                   | Delta  | B.1    |                         |                       |
| Vac1        | 0.5931  | 1.0685 | 1.1876 | 0.5399                    | 1.0117 | 1.131  | 52.26                    | 10.55                 | 0.2475  | 0.5775 | 0.6373 | 0.1943                    | 0.5207 | 0.5807 | 66.54                   | 10.33                 |
| Vac2        | 0.499   | 1.1177 | 1.072  | 0.4458                    | 1.0609 | 1.0154 | 56.10                    | -4.48**               | 0.2177  | 0.5446 | 0.5494 | 0.1645                    | 0.4878 | 0.4928 | 66.62                   | 1.01                  |
| Vac3        | 0.0768  | 0.5996 | 0.6686 | 0.0236                    | 0.5428 | 0.612  | 96.14                    | 11.31                 | 0.063   | 0.2704 | 0.2526 | 0.0098                    | 0.2136 | 0.196  | 95.00                   | -8.98                 |
| Vac4        | 0.0784  | 0.3861 | 0.4512 | 0.0252                    | 0.3293 | 0.3946 | 93.61                    | 16.55                 | 0.0634  | 0.1466 | 0.1836 | 0.0102                    | 0.0898 | 0.127  | 91.97                   | 29.29                 |
| Vac5        | 0.1932  | 0.9234 | 0.8509 | 0.14                      | 0.8666 | 0.7943 | 82.37                    | -9.10                 | 0.1244  | 0.4963 | 0.4495 | 0.0712                    | 0.4395 | 0.3929 | 81.88                   | -11.86                |
| Vac6        | 0.4661  | 0.7548 | 0.7648 | 0.4129                    | 0.698  | 0.7082 | 41.70                    | 1.44                  | 0.1713  | 0.2935 | 0.3176 | 0.1181                    | 0.2367 | 0.261  | 54.75                   | 9.31                  |
| Vac7        | 0.1763  | 0.6504 | 0.671  | 0.1231                    | 0.5936 | 0.6144 | 79.96                    | 3.39                  | 0.091   | 0.3933 | 0.4001 | 0.0378                    | 0.3365 | 0.3435 | 89.00                   | 2.038                 |
| Vac8        | 0.1557  | 0.6116 | 0.6643 | 0.1025                    | 0.5548 | 0.6077 | 83.13                    | 8.70                  | 0.0896  | 0.2682 | 0.3007 | 0.0364                    | 0.2114 | 0.2441 | 85.09                   | 13.40                 |
| Vac9        | 0.0651  | 0.1779 | 0.1821 | 0.0119                    | 0.1211 | 0.1255 | 90.52                    | 3.51                  | 0.0567  | 0.0889 | 0.0926 | 0.0035                    | 0.0321 | 0.036  | 90.28                   | 10.83                 |
| Vac10       | 0.1557  | 0.6223 | 0.6572 | 0.1025                    | 0.5655 | 0.6006 | 82.93                    | 5.84                  | 0.0836  | 0.2609 | 0.2511 | 0.0304                    | 0.2041 | 0.1945 | 84.37                   | -4.94                 |
| Vac11       | 0.0839  | 0.2665 | 0.2938 | 0.0307                    | 0.2097 | 0.2372 | 87.06                    | 11.59                 | 0.0566  | 0.1028 | 0.0835 | 0.0034                    | 0.046  | 0.0269 | 87.36                   | -71.00                |

\* The reduction rate is calculated as (OD<sub>450 nm</sub> of B.1-OD<sub>450 nm</sub> of the variant)/OD<sub>450 nm</sub> of B.1\*100%.

\*\* The reduction rate of negative numbers means similar RBD binding capability of the serum sample to SARS-CoV-2 B.1.

Table S3. OD<sub>450 nm</sub> of ELISA and the Omicron/Delta reduction rate of the RBD binding capability to the 17 convalescent serum samples from ELISA results at dilutions of 1:20 and 1:80.

| Sample name | 1:20    |        |        | 1:20(take the blank off) |        |        | Omicron reduction rate%* | Delta reduction rate% | 1:80    |        |        | 1:80(take the blank off) |        |        | Omicron reduction rate% | Delta reduction rate% |
|-------------|---------|--------|--------|--------------------------|--------|--------|--------------------------|-----------------------|---------|--------|--------|--------------------------|--------|--------|-------------------------|-----------------------|
|             | Omicron | Delta  | B.1    | Omicron                  | Delta  | B.1    |                          |                       | Omicron | Delta  | B.1    | Omicron                  | Delta  | B.1    |                         |                       |
| Conv1       | 0.6288  | 0.9353 | 0.9844 | 0.5756                   | 0.8785 | 0.9278 | 37.96                    | 5.31                  | 0.2711  | 0.6112 | 0.5966 | 0.2179                   | 0.5544 | 0.54   | 59.65                   | -2.67                 |
| Conv2       | 0.3579  | 0.6791 | 0.694  | 0.3047                   | 0.6223 | 0.6374 | 52.2                     | 2.37                  | 0.1695  | 0.3472 | 0.344  | 0.1163                   | 0.2904 | 0.2874 | 59.53                   | -1.04                 |
| Conv3       | 0.0625  | 0.0651 | 0.0654 | 0.0093                   | 0.0083 | 0.0088 |                          |                       | 0.0625  | 0.0651 | 0.0654 | 0.0093                   | 0.0083 | 0.0088 |                         |                       |
| Conv4       | 1.0669  | 1.2736 | 1.2844 | 1.0137                   | 1.2168 | 1.2278 | 17.44                    | 0.90                  | 0.5572  | 0.9734 | 1.0373 | 0.504                    | 0.9166 | 0.9807 | 48.61                   | 6.54                  |
| Conv5       | 0.2886  | 0.6688 | 0.6485 | 0.2354                   | 0.612  | 0.5919 | 60.23                    | -3.40**               | 0.1121  | 0.3269 | 0.3267 | 0.0589                   | 0.2701 | 0.2701 | 78.19                   | 0                     |
| Conv6       | 0.4436  | 0.8995 | 0.8965 | 0.3904                   | 0.8427 | 0.8399 | 53.52                    | -0.33                 | 0.2129  | 0.5222 | 0.6374 | 0.1597                   | 0.4654 | 0.5808 | 72.5                    | 19.87                 |
| Conv7       | 0.3142  | 0.6869 | 0.7255 | 0.261                    | 0.6301 | 0.6689 | 60.98                    | 5.80                  | 0.1289  | 0.2892 | 0.3261 | 0.0757                   | 0.2324 | 0.2695 | 71.91                   | 13.77                 |
| Conv8       | 0.1434  | 0.7208 | 0.7566 | 0.0902                   | 0.664  | 0.7    | 87.11                    | 5.14                  | 0.0729  | 0.287  | 0.3093 | 0.0197                   | 0.2302 | 0.2527 | 92.2                    | 8.90                  |
| Conv9       | 0.1666  | 0.3554 | 0.421  | 0.1134                   | 0.2986 | 0.3644 | 68.88                    | 18.06                 | 0.0827  | 0.1385 | 0.1712 | 0.0295                   | 0.0817 | 0.1146 | 74.26                   | 28.71                 |
| Conv10      | 0.1028  | 0.2015 | 0.3053 | 0.0496                   | 0.1447 | 0.2487 | 80.06                    | 41.82                 | 0.0751  | 0.098  | 0.2374 | 0.0219                   | 0.0412 | 0.1808 | 87.89                   | 77.21                 |
| Conv11      | 0.3335  | 0.7081 | 0.7554 | 0.2803                   | 0.6513 | 0.6988 | 59.89                    | 6.80                  | 0.1564  | 0.3414 | 0.3606 | 0.1032                   | 0.2846 | 0.304  | 66.05                   | 6.38                  |
| Conv12      | 0.829   | 1.1781 | 1.1431 | 0.7758                   | 1.1213 | 1.0865 | 28.6                     | -3.20                 | 0.3167  | 0.7027 | 0.7322 | 0.2635                   | 0.6459 | 0.6756 | 61                      | 4.40                  |
| Conv13      | 0.2683  | 0.6627 | 0.7515 | 0.2151                   | 0.6059 | 0.6949 | 69.05                    | 12.81                 | 0.1086  | 0.3269 | 0.3451 | 0.0554                   | 0.2701 | 0.2885 | 80.8                    | 6.38                  |
| Conv14      | 0.1391  | 0.412  | 0.4786 | 0.0859                   | 0.3552 | 0.422  | 79.64                    | 15.83                 | 0.0816  | 0.1518 | 0.2072 | 0.0284                   | 0.095  | 0.1506 | 81.14                   | 36.92                 |
| Conv15      | 0.1078  | 0.5168 | 0.5473 | 0.0546                   | 0.46   | 0.4907 | 88.87                    | 6.26                  | 0.0693  | 0.3405 | 0.3228 | 0.0161                   | 0.2837 | 0.2662 | 93.95                   | -6.57                 |
| Conv16      | 0.0816  | 0.2968 | 0.3469 | 0.0284                   | 0.24   | 0.2903 | 90.22                    | 17.33                 | 0.0575  | 0.1093 | 0.1175 | 0.0043                   | 0.0525 | 0.0609 | 92.94                   | 13.79                 |
| Conv17      | 0.0887  | 0.4809 | 0.5062 | 0.0355                   | 0.4241 | 0.4496 | 92.1                     | 5.67                  | 0.0643  | 0.2033 | 0.2411 | 0.0111                   | 0.1465 | 0.1845 | 93.98                   | 20.60                 |

\* The reduction rate is calculated as (OD<sub>450 nm</sub> of B.1-OD<sub>450 nm</sub> of the variant)/OD<sub>450 nm</sub> of B.1\*100%.

\*\* The reduction rate of negative numbers means similar RBD binding capability of the serum sample to SARS-CoV-2 B.1.
